# Supplementary material for: Pediatric Healthcare Utilization in a Large Cohort of Refugee Children Entering Western Europe During the Migrant Crisis
Source: MDPI journal article supplement (doi:10.3390/ijerph16224415), 2019-11-11
Supplement: s1 [file s1]

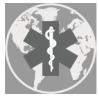

## Supplementary Tables and Figures

| Language           | %    | Language | %   |
|--------------------|------|----------|-----|
| Arabic             | 41,9 | Bangia   | 0,4 |
| Kurdish            | 22,0 | Tigrigna | 0,3 |
| Farsi/Dari/Persian | 23,4 | French   | 0,3 |
| English            | 4,5  | Bosnian  | 0,3 |
| Pashto             | 2,5  | others   | 0,3 |
| Turkish            | 1,7  | German   | 0,2 |
| Albanian           | 0,7  | Greek    | 0,1 |
| Serbian            | 0,7  | Russian  | 0,1 |
| Urdu               | 0,5  |          |     |

**Supplementary Table 1.** Languages spoken by refugees below the age of 18 years in the analyzed cohort.

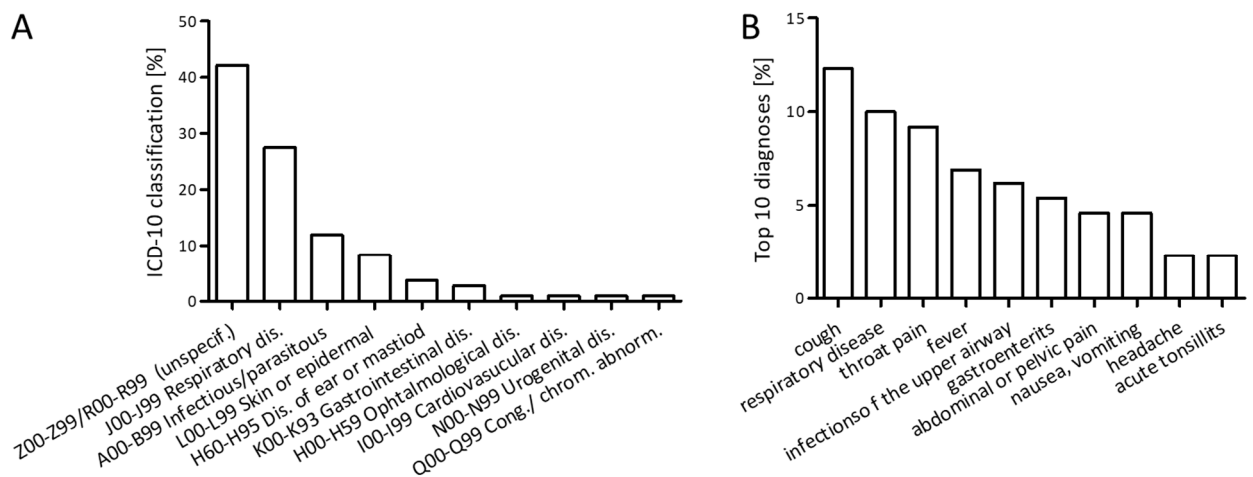

**Supplementary Fig. 1.** Top ten ICD-10 based diagnosis groups (A) and diagnoses (B) as identified in a random sample of n=100 healthcare visits within the cohort.
